# Supplementary material for: Comparison of Vibration-Assisted Scratch Characteristics of SiC Polytypes (3C-, 4H- and 6H-SiC)
Source: MDPI journal article supplement (doi:10.3390/mi13040640), 2022-04-18
Supplement: s1 [file s1]

# Supplementary Materials: Comparison of Vibration-Assisted Scratch Characteristics of SiC Polytypes (3C-, 4H- and 6H-SiC)

Wuqing Lin <sup>1,2,3</sup>, Zhongwei Hu <sup>1,2,\*</sup>, Yue Chen <sup>1,2</sup>, Yuqiang Zhang <sup>1,2</sup>, Yiqing Yu <sup>2</sup>, Xipeng Xu <sup>1,2</sup> and Jie Zhang <sup>3</sup>

<sup>1</sup> Institute of Manufacturing Engineering, Huaqiao University, Xiamen 361021, China; vince\_lin@sanan-ic.com (W.L.); chen Yue@stu.hqu.edu.cn (Y.C.); 21011080019@stu.hqu.edu.cn (Y.Z.); xpxu@hqu.edu.cn (X.X.)

<sup>2</sup> Institute of Mechanical Engineering and Automation, Huaqiao University, Xiamen 361021, China; yyqing@hqu.edu.cn

<sup>3</sup> Hunan Sanan Semiconductor Co., Ltd., Changsha 410000, China; jack\_zhang@sanan-ic.com

\* Correspondence: huzhongwei@hqu.edu.cn

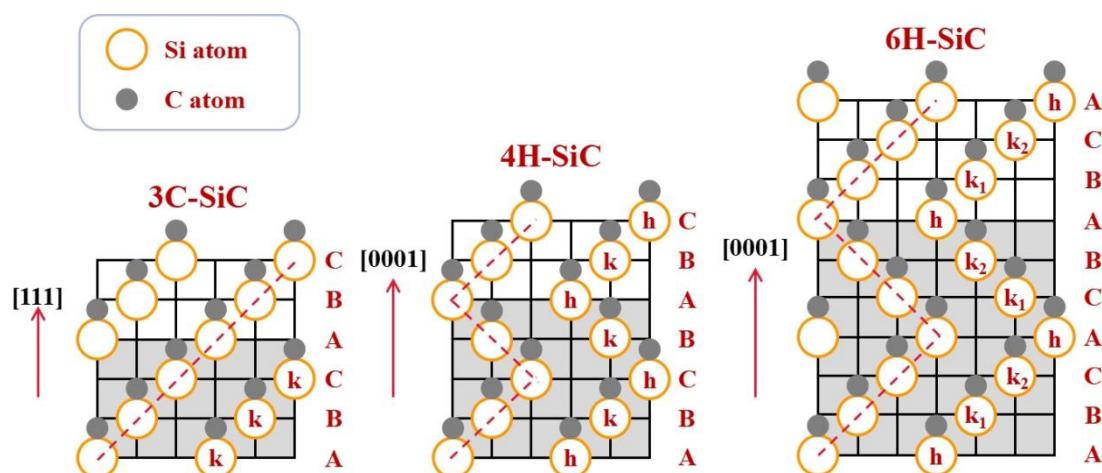

**Figure S1.** Schematic diagram of atomic arrangement of SiC polytypes (3C-, 4H- and 6H-SiC) [15], "h" and "k" represent the sites of hexagonal and cubic.

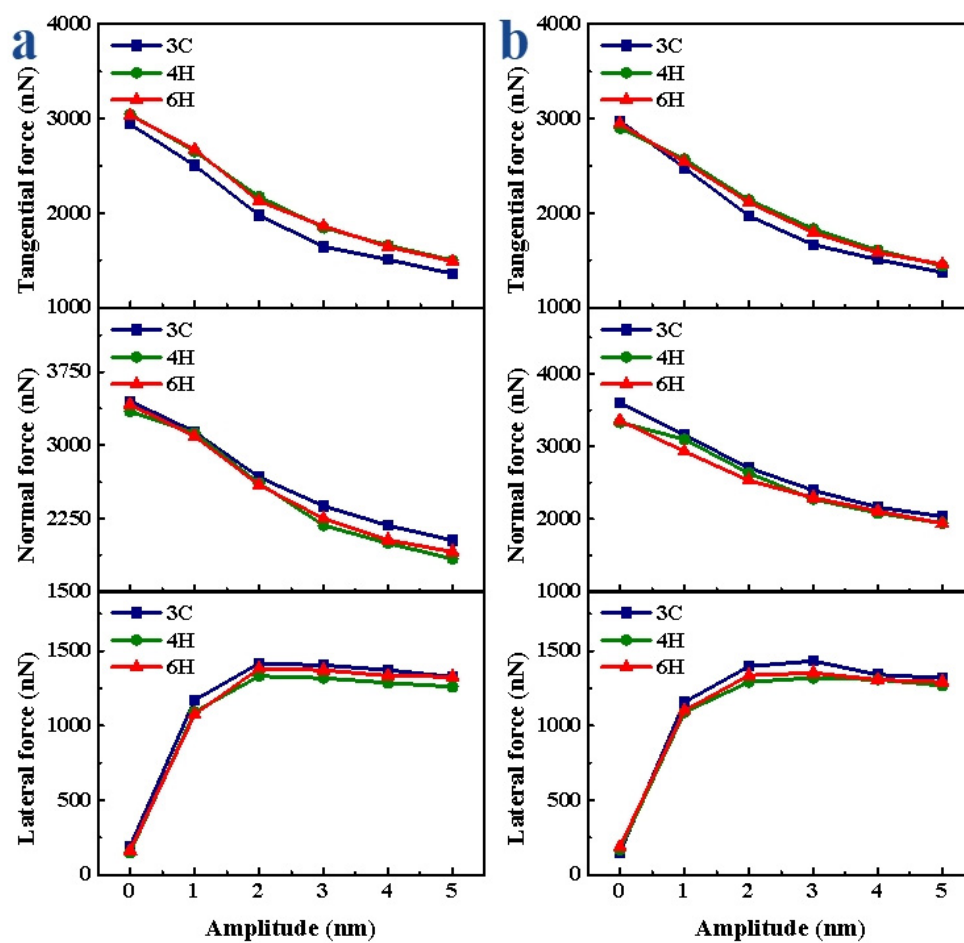

**Figure S2.** Variation of scratch force of SiC polytypes with different amplitudes: (a) Si-face and (b) C-face of SiC.

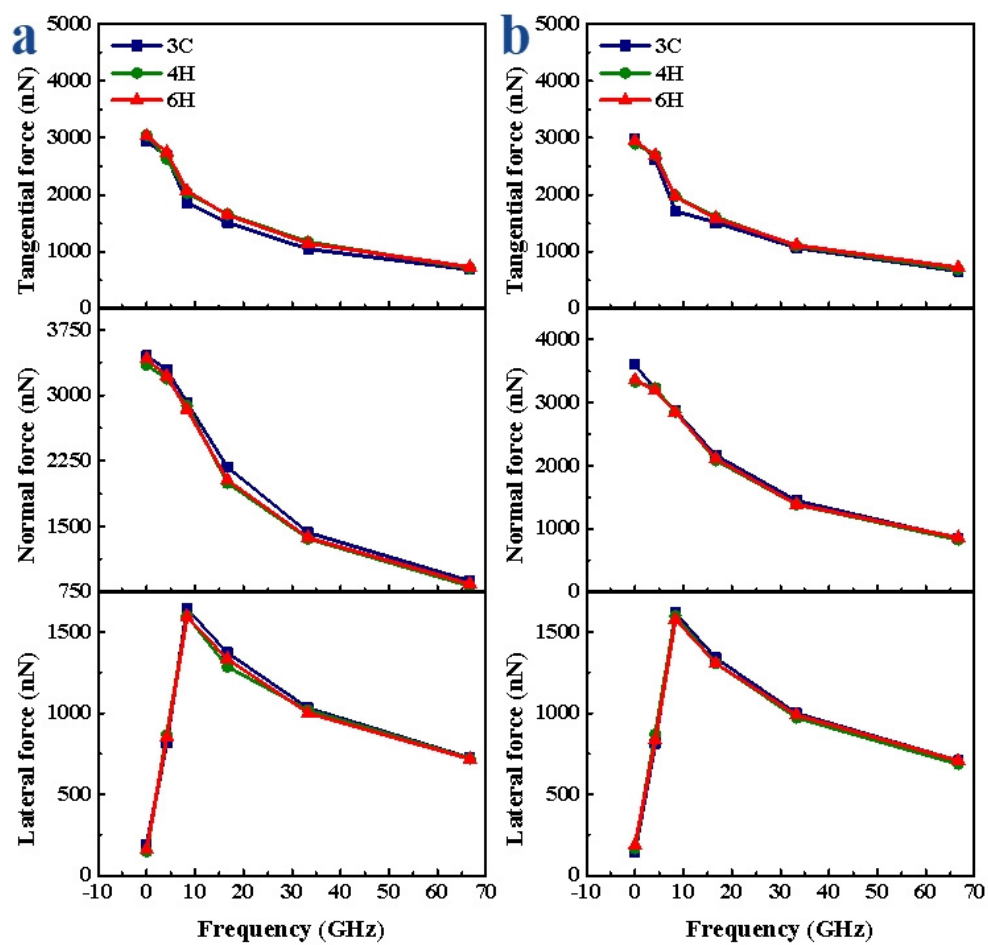

**Figure S3.** Variation of scratch force of SiC polytypes with different frequencies: (a) Si-face and (b) C-face of SiC.

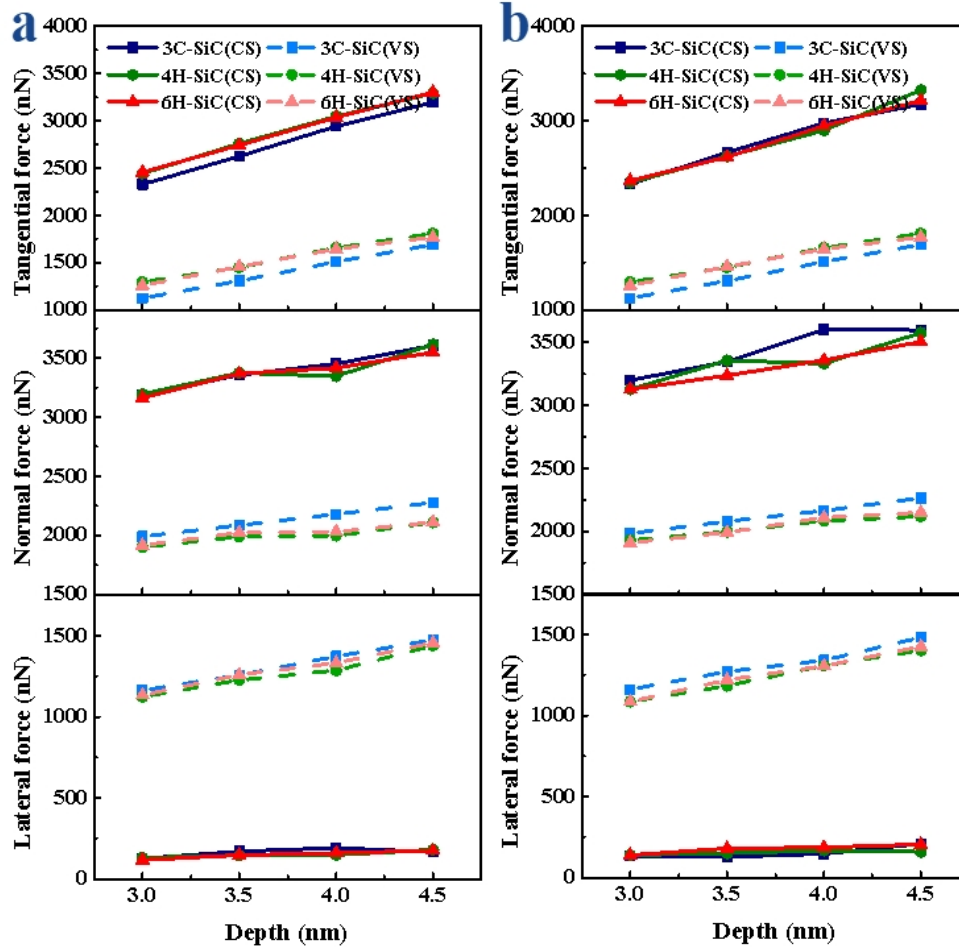

**Figure S4.** Variation of scratch force of SiC polytypes with different depths: (a) Si-face and (b) C-face of SiC.

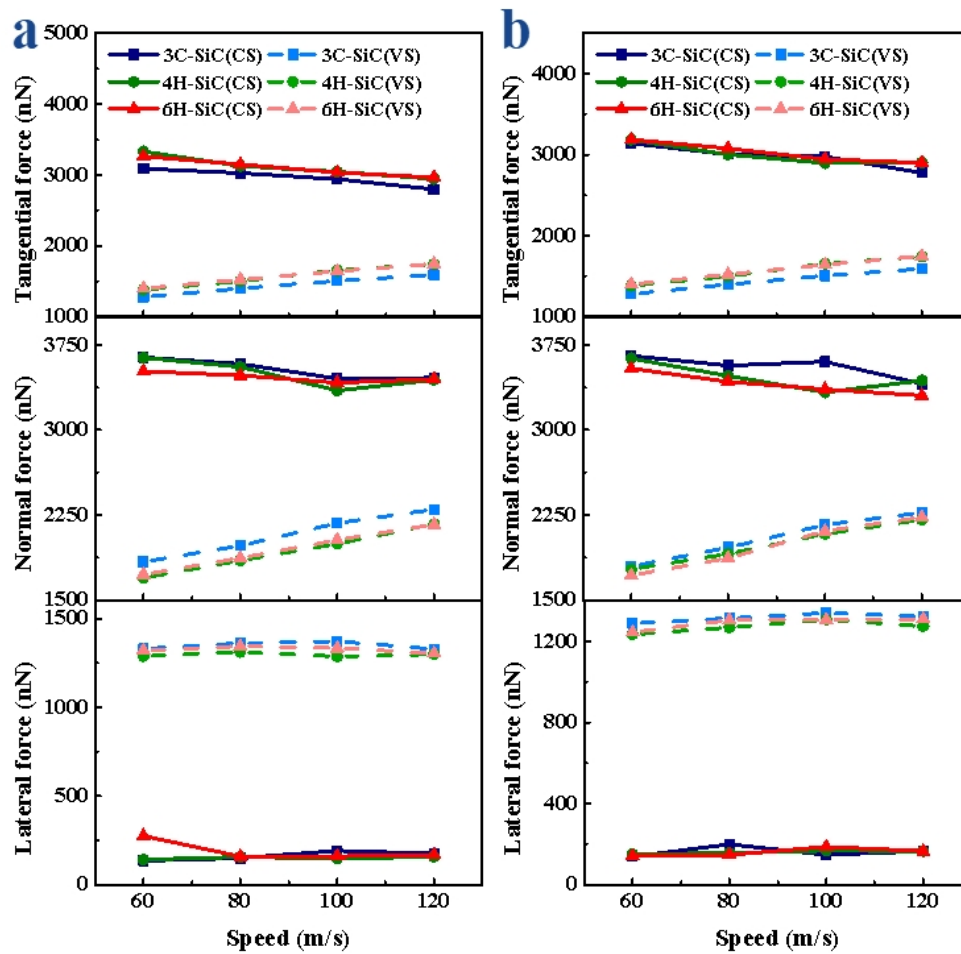

**Figure S5.** Variation of scratch force of SiC polytypes with different speeds: (a) Si-face and (b) C-face of SiC.
